# Supplementary material
Source: publisher site journal article supplement (https://www.dovepress.com/article/496420)
Supplement: Supplementary file 1 [file get_supplementary_file.php]

**Supplementary Table 1: Washout Periods**

| **IOP-Lowering Medication** | **Minimum Washout Period** |
| --- | --- |
| Miotics and oral/topical carbonic anhydrase inhibitors | 5 Days |
| Alpha and alpha/beta agonists | 14 days |
| Beta-antagonists | 28 days |
| Prostaglandin Analogues (PGAs) and NO-donating PGAs | 28 days |
| Rho-Kinase inhibitors | 28 days |

**Note: for combination therapy or products, the minimum washout period is that of the component with the longest washout period**

**Supplementary Table 2: Side Effects Questionnaire**

STUDY NUMBER: DATE: / /

Please fill out form every evening (8:00pm). During the study, refrain from changes in your diet and water intake.

Please fill out the time medication is taken:

Time medication taken: AM PM (Day 7 – Day 14) The following survey is to assess the potential side effects of the medication you are receiving.

Report the SEVERITY of your symptoms using the ratings below. Put an X in the category that best describes how you feel:

| No Problems | Tolerable: not perfect but not uncomfortable | Uncomfortable: irritating, but does not interfere with my day | Bothersome: irritating and interferes with my day | Intolerable: unable to perform my daily tasks |
| --- | --- | --- | --- | --- |

|  | No problems | Tolerable | Uncomfortable | Bothersome | Intolerable |
| --- | --- | --- | --- | --- | --- |
| **Symptoms** | 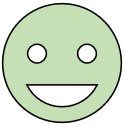 | 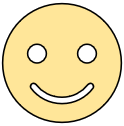 | 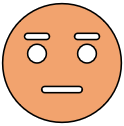 | 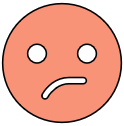 | 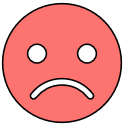 |
| **Pain in Hands or Feet** | ○ | ○ | ○ | ○ | ○ |
| **Burning in Hands or Feet** | ○ | ○ | ○ | ○ | ○ |
| **Tingling in Hands or Feet** | ○ | ○ | ○ | ○ | ○ |
| **Hearing Problems** | ○ | ○ | ○ | ○ | ○ |
| **Ringing in Ears** | ○ | ○ | ○ | ○ | ○ |
| **General Weakness** | ○ | ○ | ○ | ○ | ○ |
| **Lack of Energy** | ○ | ○ | ○ | ○ | ○ |
| **Tiredness** | ○ | ○ | ○ | ○ | ○ |
| **Vomiting** | ○ | ○ | ○ | ○ | ○ |
| **Diarrhea** | ○ | ○ | ○ | ○ | ○ |
| **Change in Taste** | ○ | ○ | ○ | ○ | ○ |
| **Increase Urination** | ○ | ○ | ○ | ○ | ○ |
| **Blurry Vision** | ○ | ○ | ○ | ○ | ○ |
| **Other:** | ○ | ○ | ○ | ○ | ○ |
